# Supplementary material for: Interictal Abnormalities of Neuromagnetic Gamma Oscillations in Migraine Following Negative Emotional Stimulation
Source: Front Behav Neurosci. 2018 Aug 17;12:169. doi: 10.3389/fnbeh.2018.00169 (PMC6108251; doi:10.3389/fnbeh.2018.00169)
Supplement: Supplementary file 1 [file Data_Sheet_1.xls]

## Sheet: 发作性偏头痛慢性偏头痛正常对照潜伏期振幅比较
									Supplementary1. The main dependent variables analyzed in the MEG spectrograms for study groups.
					Latency M100 (ms)			Latency M170 (ms)			Amplitude M100 (fT)			Amplitude M170 (fT)			Spectral power value M100 (fT/Hz)			Spectral power value M170 (fT/Hz)
ID	Diagnosis	Sex	Age	Fear	Happy	Neurol	Fear	Happy	Neurol	Fear	Happy	Neurol	Fear	Happy	Neurol	Fear	Happy	Neurol	Fear	Happy	Neurol
1	EM	male	25	114.167	112.167	116.667	164.833	147.167	149.833	101.5	64.706	86.962	74.225	77.454	57.243	0.3395	0.406	0.3715	0.4685	0.6845	0.5635
2	EM	male	21	97.5	119	119.667	141.333	156	154.667	113.258	154.633	129.621	104.03	80.389	82.615	0.377	0.3465	0.4205	0.277	0.1795	0.421
3	EM	female	44	108.5	125.333	118.667	157.167	171.833	159.167	107.056	97.489	83.622	93.653	89.254	66.16	0.389	0.4065	0.398	0.3585	0.4135	0.2975
4	EM	male	29	131	127.333	127.333	181	175.667	175.667	89.49	64.334	64.334	74.52	58.887	86.046	0.3395	0.406	0.3715	0.4685	0.6845	0.5635
5	EM	male	31	97.833	116.833	99.667	144.167	150.5	131.5	78.615	88.714	74.43	80.288	77.454	80.162	0.3405	0.3995	0.368	0.338	0.401	0.3225
6	EM	male	16	110	102.167	109	204.833	145.833	175.333	70.571	56.613	78.287	75.178	77.454	77.454	0.3405	0.3995	0.368	0.338	0.3	0.421
7	EM	male	32	103.333	158	101.667	158.667	201.333	164.167	86.529	75.091	77.733	104.03	58.137	86.245	0.5105	0.472	0.4325	0.399	0.413	0.37
8	EM	female	39	96	97.833	110.167	135.667	148.5	157.5	89.471	96.377	77.164	81.054	83.463	77.454	0.4945	0.453	0.3905	0.386	0.4205	0.433
9	EM	female	33	106	106.333	106.167	152.667	153.5	153.333	149.15	118.483	96.945	104.03	105.054	108.85	0.3285	0.4085	0.5965	0.4365	0.476	0.284
10	EM	male	22	91.667	175.667	144.5	139.5	214.333	194	110.764	80.663	66.799	82.436	61.502	91.125	0.528	0.4225	0.4825	0.603	0.5125	0.395
11	EM	female	24	86.333	83.333	83.333	159.667	130.5	128.333	78.587	90.223	97.631	73.537	61.329	74.648	0.552	0.483	0.5305	0.4155	0.3455	0.3095
12	EM	female	27	106.333	84.833	97	159.667	144.5	145.333	113.658	102.121	117.561	73.537	91.218	108.85	0.447	0.408	0.3745	0.3225	0.626	0.438
13	EM	female	37	88.333	98.5	94.333	163.333	156	134.833	84.398	64.712	85.941	91.418	77.454	76.774	0.6085	0.5045	0.6145	0.427	0.558	0.5445
14	EM	female	30	105	109.167	108.833	163	139.5	137.833	112.755	129.902	129.621	118.461	64.717	86.046	0.623	0.386	0.608	0.5885	0.4735	0.565
15	EM	male	34	105	109.167	108.833	163	139.5	137.833	112.755	129.902	129.621	118.461	64.717	86.046	0.5015	0.4925	0.7855	0.544	0.6845	0.5635
16	EM	female	18	83.5	107.667	108.5	129.5	159.333	204.333	79.745	70.742	80.531	86.975	77.454	66.329	0.452	0.4455	0.515	0.4745	0.336	0.3955
17	EM	female	20	95.167	95.333	95.5	173.5	139.833	147.833	80.765	70.482	84.941	78.495	77.454	114.518	0.464	0.4155	0.514	0.4665	0.617	0.4825
18	EM	female	31	83	114.333	114.667	132.5	157	171	67.465	104.967	80.582	93.334	52.208	79.454	0.456	0.4815	0.413	0.422	0.3825	0.351
19	EM	female	31	107.167	119.833	106	166.833	164.667	149.167	84.448	88.171	67.741	67.26	86.804	66.16	0.552	0.483	0.5305	0.4155	0.3455	0.3095
20	EM	female	15	119.833	92.667	117	165	144.5	150	104.758	40.213	74.616	90.185	77.454	79.454	0.443	0.5295	0.4895	0.4645	0.522	0.522
1	CM	male	45	119.833	92.667	117	165	144.5	150	104.758	40.213	74.616	90.185	77.454	79.454	0.447	0.4725	0.5335	0.4235	0.3895	0.4075
2	CM	female	23	119.833	92.5	90.667	165	139.167	131	104.758	102.498	96.115	93.185	95.066	97.909	0.46	0.3735	0.515	0.3845	0.517	0.4265
3	CM	female	40	103.75	113.667	95	166	165.667	132	61.334	90.447	72.616	68.054	77.455	95.803	0.349	0.287	0.3205	0.271	0.4745	0.432
4	CM	female	25	89.167	117.833	99.833	147.167	160	140.667	78.076	69.82	91.387	78.734	50.128	77.454	0.36	0.295	0.409	0.455	0.4805	0.346
5	CM	female	40	111.667	121.167	122.833	149.667	155	156.5	137.867	110.288	106.834	67.271	77.454	77.454	0.46	0.3745	0.375	0.4385	0.5785	0.5645
6	CM	female	51	111.667	121.167	122.833	149.667	155	156.5	137.867	110.288	106.834	67.271	77.454	77.454	0.5235	0.417	0.4825	0.4565	0.475	0.4785
7	CM	female	43	91.833	91.5	89.667	152.333	132.5	138.833	83.867	68.328	70.679	67.345	51.589	78.454	0.244	0.3185	0.338	0.38	0.57	0.4095
8	CM	female	27	107.167	119.833	106	166.833	164.667	149.167	84.448	88.171	77.741	67.26	86.804	66.16	0.4745	0.375	0.5585	0.4255	0.5055	0.4185
9	CM	female	33	91.833	91.5	89.667	152.333	132.5	138.833	83.867	68.328	70.679	67.345	51.589	78.454	0.2595	0.2555	0.329	0.3945	0.308	0.4035
10	CM	female	27	111.667	110.667	108	149.667	150	154.167	137.867	90.802	123.718	69.271	75.079	86.046	0.5665	0.4925	0.511	0.528	0.4715	0.593
11	CM	female	48	100.5	117.833	143.333	136.333	159.833	176.833	78.615	88.714	74.43	60.288	48.762	80.162	0.2765	0.3275	0.5035	0.5605	0.461	0.4105
12	CM	female	37	89.333	90	112.333	130.5	120.333	186.167	52.779	55.171	91.166	62.754	27.947	20.911	0.274	0.3025	0.733	0.5885	0.5735	0.523
13	CM	female	44	111.667	110.667	108	149.667	150	154.167	137.867	90.802	123.718	69.271	75.079	86.046	0.533	0.451	0.589	0.581	0.632	0.5245
14	CM	female	46	100.5	117.833	143.333	136.333	159.833	176.833	78.615	88.714	74.43	60.288	48.762	80.162	0.4015	0.3605	0.4015	0.352	0.448	0.5
15	CM	male	20	89.333	90	112.333	130.5	120.333	186.167	52.779	55.171	91.166	62.754	27.947	20.911	0.5625	0.538	0.535	0.4915	0.6225	0.46
1	Control	female	20	100.833	101.333	102	149	149.667	149.667	144.601	135.687	115.173	127.54	111.285	93.728	0.5815	0.4155	0.625	0.4535	0.546	0.61
2	Control	female	46	93.667	109.667	98.833	145.5	143.333	144.333	92.973	75.546	101.033	100.657	96.108	100.948	0.4455	0.541	0.66	0.506	0.6235	0.5135
3	Control	male	37	100.833	101.333	102	149	149.667	149.667	144.601	135.687	115.173	127.54	111.285	93.728	0.443	0.5295	0.4895	0.4645	0.522	0.522
4	Control	male	26	104.833	101.5	97.833	139	157.333	141	89.631	60.358	100.749	62.981	104.751	128.445	0.509	0.4795	0.691	0.5465	0.8285	0.5295
5	Control	male	28	121.333	101.667	116.333	165.167	163.833	164.167	93.936	70.473	115.173	102.58	109.369	108.85	0.305	0.398	0.4175	0.3695	0.5985	0.4295
6	Control	female	33	114.833	128	115.167	166.333	179.333	212.667	84.892	60.592	91.828	90.93	65.16	59.597	0.5565	0.5635	0.6225	0.491	0.5595	0.499
7	Control	female	30	92.833	82.667	94.167	138.333	137.333	136.333	94.166	115.858	110.774	118.578	124.168	93.728	0.666	0.4385	0.8815	0.727	0.61	0.584
8	Control	male	16	128.167	124.833	126.667	170.5	158.5	159.5	125.318	108.97	102.723	90.93	80.212	126.686	0.4405	0.3225	0.4345	0.4215	0.4145	0.32
9	Control	female	32	87.667	93.167	89.5	132.5	140.833	138.333	81.019	73.406	67.933	81.697	78.412	66.915	0.743	0.646	0.5815	0.657	0.56	0.5535
10	Control	female	31	118.5	117	118	168	150.5	152.833	156.652	135.366	108.52	132.832	111.285	100.948	0.3945	0.336	0.3935	0.4785	0.499	0.451
11	Control	male	20	108.5	95.833	96.833	154	139.667	139	99.163	83.881	74.908	67.579	80.212	114.118	0.5805	0.4385	0.7405	0.617	0.6865	0.461
12	Control	male	30	107	106.667	107.667	157.5	153.833	156.333	99.163	83.881	74.908	67.579	80.212	114.518	0.434	0.306	0.453	0.371	0.5275	0.436
13	Control	male	27	92.833	82	93.333	178.167	178	146.5	88.501	68.09	84.98	78.046	53.661	85.549	0.4495	0.5085	0.3895	0.574	0.4955	0.3845
14	Control	female	21	100.5	103.667	112.5	146	144.667	163.167	76.503	77.615	90.027	75.484	62.847	69.591	0.6185	0.526	0.357	0.423	0.461	0.3865
15	Control	female	27	121.667	118.333	106	154.167	168.167	169	48.883	67.648	55.47	97.832	62.876	45.238	0.4975	0.438	0.517	0.4335	0.52	0.334
16	Control	male	13	102.167	104.667	96.667	163.667	189.333	177.333	97.226	133.758	126.779	97.832	93.728	112.192	0.264	0.49	0.421	0.331	0.4075	0.428
17	Control	female	24	114.333	87.333	116.667	159	132.833	204	115.519	98.244	73.392	91.242	115.692	85.03	0.5485	0.551	0.5065	0.529	0.477	0.442
18	Control	male	27	115	117.167	122.167	155.833	167.167	170.5	72.091	74.59	67.538	88.262	89.92	74.545	0.475	0.4375	0.341	0.315	0.411	0.359
19	Control	female	25	108.5	100	101.833	150.167	177.167	180.167	80.849	132.024	145.207	81.692	95.217	72.013	0.4135	0.529	0.4365	0.4165	0.428	0.322
20	Control	male	35	81	87.333	128.333	148.667	121.833	192.833	51.606	58.465	74.696	38.79	54.71	62.263	0.5055	0.5745	0.5475	0.4305	0.5745	0.54
21	Control	male	25	101.667	112.167	98.333	176.167	176.5	190.167	109.459	86.397	96.445	126.525	86.439	108.85	0.454	0.499	0.5085	0.5935	0.382	0.3995
22	Control	male	32	92.167	114.667	109	139.333	180.5	172.5	76.147	66.791	86.95	95.681	57.415	71.991	0.46	0.404	0.424	0.2385	0.559	0.4155
23	Control	female	41	107.333	98.5	107.333	152.333	154.833	177.167	141.044	96.851	124.198	155.417	93.728	103.364	0.459	0.4895	0.528	0.508	0.3565	0.424
24	Control	female	48	92.167	114.667	109	139.333	180.5	172.5	76.147	66.791	86.95	95.681	57.415	71.991	0.4855	0.3865	0.4885	0.399	0.552	0.488
25	Control	female	25	107.333	98.5	107.333	152.333	154.833	177.167	141.044	96.851	124.198	155.417	93.728	103.364	0.4645	0.455	0.651	0.424	0.3915	0.3955
26	Control	male	25	106.667	143.667	108.5	174.333	188.167	173.833	84.951	74.827	86.95	74.225	61.766	61.991	0.4865	0.417	0.3865	0.3835	0.4185	0.365
27	Control	female	43	106.667	143.667	108.5	174.333	188.167	173.833	84.951	74.827	86.95	74.225	61.766	61.991	0.541	0.4685	0.6075	0.456	0.623	0.6505
28	Control	female	26	82.667	79.667	101.333	137.167	147.833	141.167	92.973	75.546	101.033	100.657	96.108	100.948	0.4215	0.402	0.519	0.459	0.4905	0.421
29	Control	female	33	106.667	143.667	108.5	174.333	188.167	173.833	84.951	74.827	86.95	74.225	61.766	61.991	0.671	0.4385	0.566	0.6655	0.663	0.6455
30	Control	female	34	113.167	124.833	89.667	157	158.5	157.333	141.436	108.97	120.532	103.021	93.728	93.726	0.43	0.3885	0.446	0.3975	0.6165	0.608
31	Control	female	26	88.333	90.833	107.5	128.667	139.833	151.333	71.136	55.758	86.091	68.612	49.332	80.359	0.367	0.3325	0.4035	0.389	0.3215	0.359
32	Control	female	26	94.167	102.833	98.333	135	145.5	190.167	105.977	109.194	96.445	140.019	97.104	106.85	0.671	0.4385	0.566	0.6655	0.663	0.6455
33	Control	female	27	94.167	102.833	98.333	135	145.5	190.167	105.977	109.194	96.445	130.019	97.104	108.85	0.43	0.3885	0.446	0.3975	0.6165	0.608
34	Control	female	26	114.833	128	115.167	166.333	179.333	212.667	84.892	60.592	91.828	81.697	65.16	49.597	0.671	0.4385	0.566	0.6655	0.663	0.6455
35	Control	female	25	82.5	121.333	115.167	172.833	168	164.167	95.665	77.17	101.033	98.918	67.613	103.764	0.454	0.499	0.5085	0.5935	0.382	0.3995
